# Supplementary material
Source: PubMed Central journal article supplement (PMC7614339)
Supplement: EMS164652-supplement-Supplementary_Information.pdf [file EMS164652-supplement-Supplementary_Information.pdf]

## Supplementary information

### **A molecular network of conserved factors keeps ribosomes dormant in the egg**

Friederike Leesch<sup>1,2#</sup>, Laura Lorenzo-Orts<sup>1#\*</sup>, Carina Pribitzer<sup>1</sup>, Irina Grishkovskaya<sup>1</sup>, Josef Roehsner<sup>1,2</sup>, Anastasia Chugunova<sup>1</sup>, Manuel Matzinger<sup>1</sup>, Elisabeth Roitinger<sup>1</sup>, Katarina Belačić<sup>1,2</sup>, Susanne Kandolf<sup>1</sup>, Tzi-Yang Lin<sup>1,2</sup>, Karl Mechtler<sup>1</sup>, Anton Meinhart<sup>1</sup>, David Haselbach<sup>1\*</sup>, Andrea Pauli<sup>1\*</sup>

*(1) Research Institute of Molecular Pathology (IMP), Vienna BioCenter (VBC), Vienna, Austria*

*(2) Vienna BioCenter PhD Program, Doctoral School of the University of Vienna and Medical University of Vienna, Vienna, Austria*

# equal contribution

\* Corresponding authors

Contact details: [andrea.pauli@imp.ac.at](mailto:andrea.pauli@imp.ac.at), [david.haselbach@imp.ac.at](mailto:david.haselbach@imp.ac.at),  
[laura.lorenzo.orts@imp.ac.at](mailto:laura.lorenzo.orts@imp.ac.at)

Table of contents:

| <b>Figure</b>          | <b>Title</b>                                                                     | <b>Location</b>   |
|------------------------|----------------------------------------------------------------------------------|-------------------|
| Supplementary Figure 1 | Features and further analyses of mutants and transgenic lines used in this study | <i>Page 3</i>     |
| Supplementary Figure 2 | Uncropped blots                                                                  | <i>Page 5-7</i>   |
| Supplementary Table 1  | Proteins differentially associated with ribosomes                                | <i>Excel file</i> |
| Supplementary Table 2  | Cryo-EM data collection and refinement statistics                                | <i>Page 8</i>     |
| Supplementary Table 3  | CryoDRGN analysis of ribosome particles                                          | <i>Excel file</i> |
| Supplementary Table 4  | Dap, Dap1b/Dap11 and Hapb4 crosslinks                                            | <i>Excel file</i> |
| Supplementary Table 5  | List of primers                                                                  | <i>Page 9</i>     |

## Supplementary Figure and Table legends:

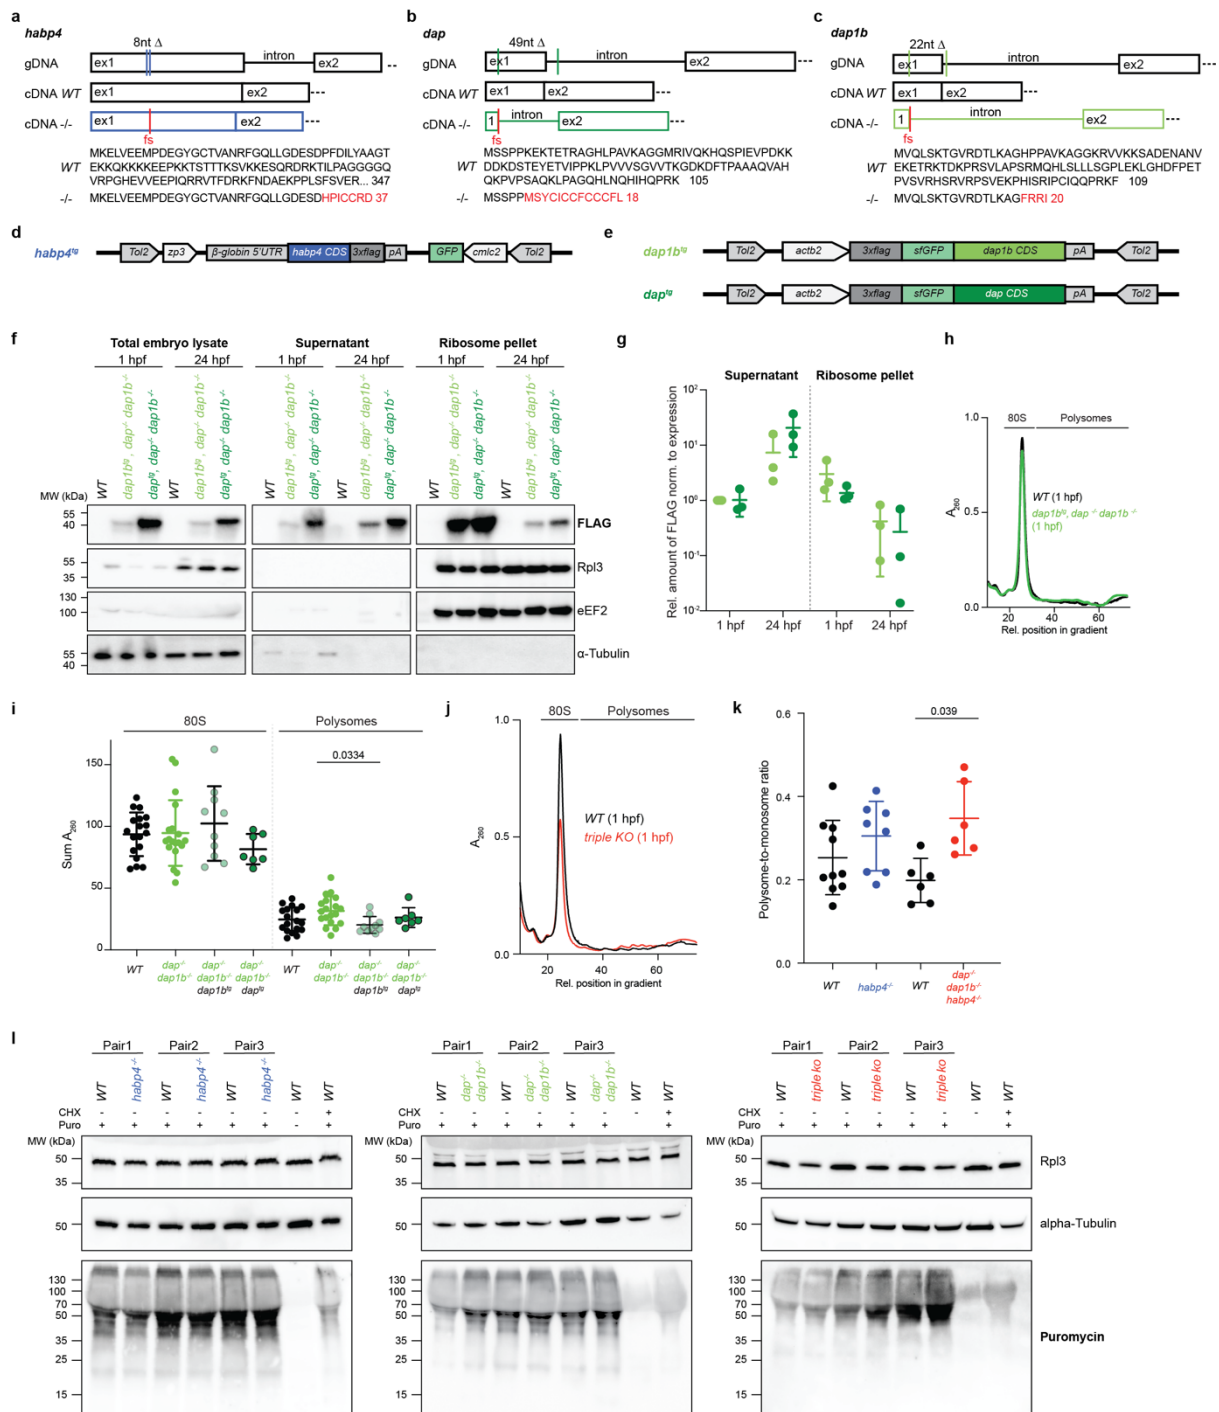

**Supplementary Figure 1. Features and further analyses of mutants and transgenic lines used in this study.** **a-c**, Scheme showing deletions and predicted coding sequences in *habp4* (**a**), *dap* (**b**) and *dap1b* (**c**) mutants. **d**, Scheme of the construct used to express *Habp4* under the control of the germline specific *zp3* promoter (*habp4<sup>tg</sup>*). **e**, Scheme of the constructs used to express *Dap1b* and *Dap* under the control of the *actb2* promoter (*dap<sup>tg</sup>*/*dap1b<sup>tg</sup>*). **f**, Representative western blots of transgenic flag-tagged *Dap* and *Dap1b* in total embryo lysates, supernatants and ribosome pellets. For uncropped images of membranes see **Supplementary Fig. 2e**. **g**, Quantification of *Dap*/*Dap1b* levels in ribosome and supernatant at 1 and 24 hours post-fertilization (hpf). Flag signal was normalized to total lysate and to

the loading controls eEF2 and Rpl3 ( $n = 3$  independent experiments). **h**, Representative polysome profiles from 1 hpf embryos derived from *WT* and *dap1b<sup>tg</sup>*, *dap<sup>-/-</sup>*, *dap1b<sup>-/-</sup>* parents. **i**, Quantification of monosomes and polysomes from 1 hpf embryos (*WT*:  $n = 18$ ; *dap<sup>-/-</sup>*, *dap1b<sup>-/-</sup>*:  $n = 19$ ; *dap1b<sup>tg</sup>*, *dap<sup>-/-</sup>*, *dap1b<sup>-/-</sup>*:  $n = 10$ ; *dap<sup>tg</sup>*, *dap<sup>-/-</sup>*, *dap1b<sup>-/-</sup>*:  $n = 7$ ). **j**, Representative polysome profiles from 1 hpf *WT* and *triple KO* embryos. **k**, Quantification of polysome-to-monomer ratios of polysome profiles from 1 hpf embryos (*WT*:  $n = 10$ ; *hap4<sup>-/-</sup>*:  $n = 8$ ; *WT* and *dap<sup>-/-</sup>*, *dap1b<sup>-/-</sup>*, *hap4<sup>-/-</sup>* (*triple KO*):  $n = 6$  in both). **l**, Representative western blots of single, double and *triple KO* embryos from 3 independent crosses injected with puromycin (experiments were performed twice with similar results, see quantifications in **Fig. 3i-j**). Rpl3 and Tubulin are used for normalization. CHX: cycloheximide; Puro: puromycin. For uncropped images of membranes see **Supplementary Fig. 2c**. For **i** and **j**,  $n$  are biologically independent samples. Statistical analysis was performed with two-sided Mann-Whitney (**g** and **j**) and Kruskal-Wallis followed by Dunn's two-sided test (**i**, **k**; for **i**, statistical significance was calculated separately for 80S and polysomes). In **g**, **i** and **k**, data are represented as scattered dot plots with mean and SD.

**a** Full scans of membranes shown in Figure 4c and Extended Data Figure 9a

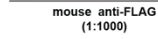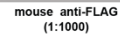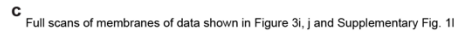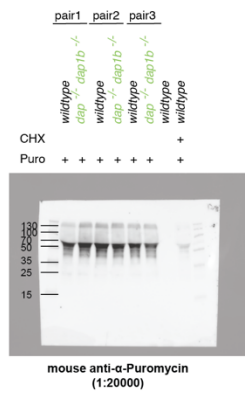

**d** Full scans of membranes shown in **Extended Data Figure 9d**

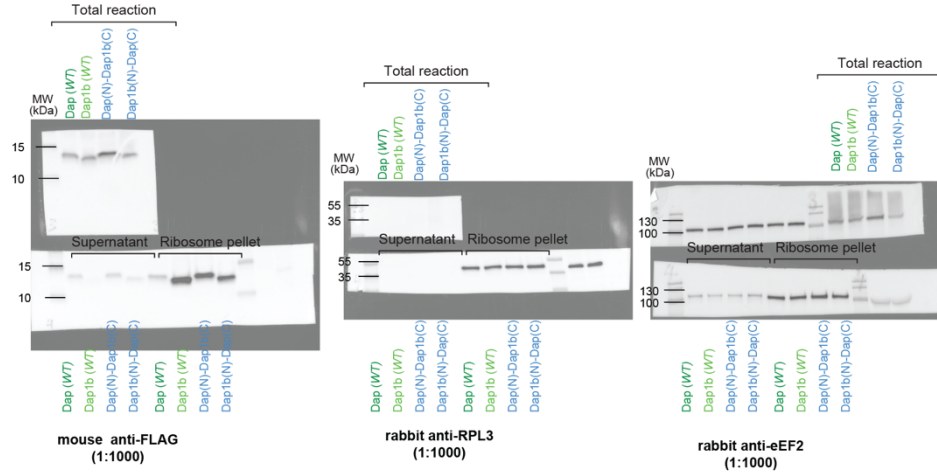

**e** Full scans of membranes shown in **Supplementary Data Figure 1f**

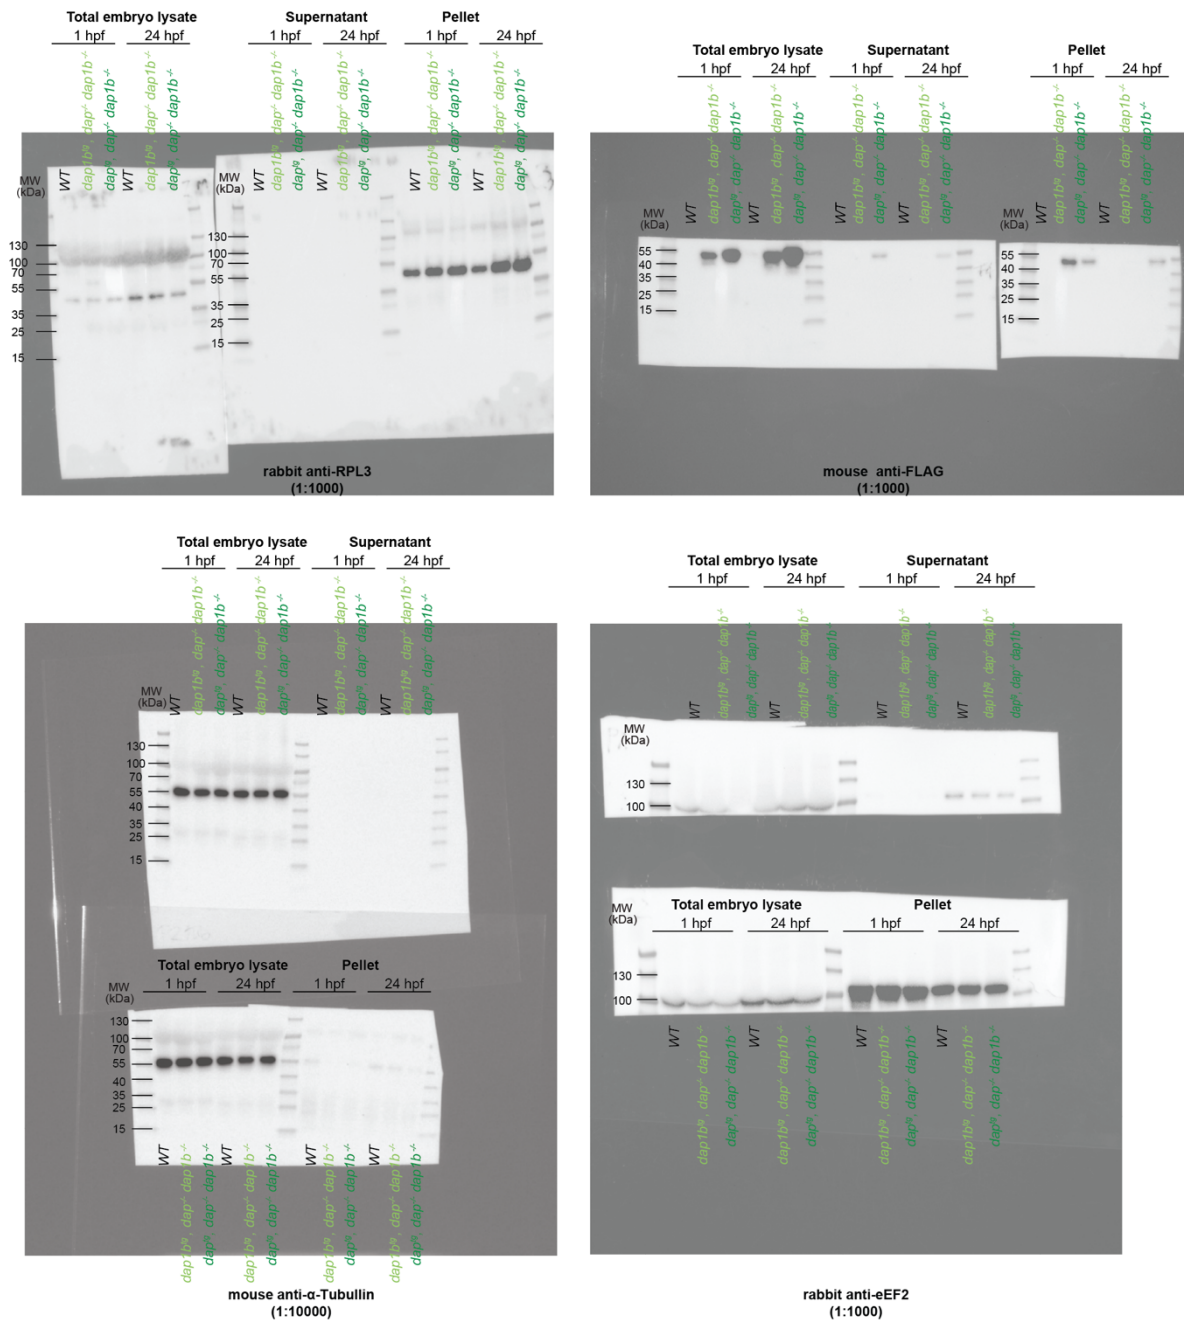

**Supplementary Figure 2. Uncropped blots.** Shown are composite images of Western blot membranes (except for the second image in panel **b**, where no colorimetric image was taken) prior to cropping for presentation in the figures (corresponding figure panels are indicated above the blot images). Antibodies and dilutions are indicated below the images in bold; MW (molecular weight), kDa (kilodalton). All *in vitro* transcription reactions analyzed by Western blot were controlled for loading by respective loading controls (Rpl3, eEF2 and alpha-Tubulin), which are included in the respective figures (**Supplementary Fig. 2a, b, d**). Equal loading of embryo lysates and fractions was controlled for by using equal amounts of embryos for each condition and loading of equal volumes. Loading controls are included in the respective panels in each figure (**Supplementary Fig. 2c, e**). **a-b**, Individual membranes where cut at 70 and 25 kDa. Membranes with samples from the total reaction, supernatant and pellet fraction were imaged together. **c**, Full membranes for each experiment were stripped and analyzed with anti-Puromycin, anti-Rpl3 and anti-alpha-Tubulin antibody in the respective order. **d**, Individual membranes where cut at 70 and 25 kDa. Membranes with samples from the total reaction, supernatant and pellet fraction were imaged together. Unlabeled bands belong to an experiment which was conducted independently of the shown experiment. **e**, Membranes were partially cut (membranes analyzed with anti-eEF2 and anti-FLAG antibody).

**Supplementary Table 1. Proteins differentially associated with ribosomes.** Proteins significantly enriched or depleted in ribosomes isolated from 1 hpf zebrafish embryos versus zebrafish eggs, 3 hpf and 6 hpf embryos (permutation-based false discovery rates < 0.05).

See excel file

**Supplementary Table 2. Cryo-EM data collection and refinement statistics.** Data collection, refinement, B factors, RMSD deviations and validation scores of ribosome structures from 1 hpf zebrafish (PDB-7OYA), 6 hpf zebrafish (PDB-7OYB), *Xenopus* egg (PDB-7OYC) and rabbit reticulocyte lysate supplemented with recombinant zebrafish Dap1b (PDB-7OYD).

|                                                     | 1 hpf zebrafish           | 6 hpf zebrafish     | <i>Xenopus</i> egg   | Rabbit + Dap1b                                           |
|-----------------------------------------------------|---------------------------|---------------------|----------------------|----------------------------------------------------------|
| PDB ID                                              | 7OYA                      | 7OYB                | 7OYC                 | 7OYD                                                     |
| <b>Data collection</b>                              |                           |                     |                      |                                                          |
| Microscope                                          | Thermo Fisher Titan Krios |                     |                      |                                                          |
| Acceleration Voltage (kV)                           | 300                       |                     |                      |                                                          |
| Detector                                            | Falcon 3 EC               | Falcon 3 EC         | Falcon 3 EC          | K3                                                       |
| Magnification (nominal)                             | 81,000                    | 81,000              | 105,000              | 81,000                                                   |
| Defocus range (μm)                                  | 0.5-4                     | 0.5-3               | 0.2-2                | 0.4-3.2                                                  |
| Calibrates pixel size (Å/px)                        | 1.1                       | 1.04                | 0.82                 | 1.07                                                     |
| Electron exposure (e <sup>-</sup> /Å <sup>2</sup> ) | 43                        | 48                  | 40                   | 50                                                       |
| Exposure rate (e <sup>-</sup> /Å <sup>2</sup> /s)   | 43                        | 48                  | 40                   | 50                                                       |
| Number of frames per movie                          | 39                        | 39                  | 39                   | 41                                                       |
| Collection software                                 | Cryosparc 3.2.0           | Cryosparc 3.2.0     | Cryosparc 3.2.0      | Cryosparc 3.2.0                                          |
| Number of micrographs                               | 17,040                    | 11,860              | 9,832                | 9,127                                                    |
| Initial particle number                             | 1,961,364                 | 1,285,670           | 635,641              | 1,808,120                                                |
| Final particle number                               | 535,633                   | 775,288             | 465,392              | 479,754                                                  |
| Map resolution (Å, FSC=0.143)                       | 3.2                       | 2.6                 | 2.8                  | 2.4                                                      |
| <b>Refinement</b>                                   |                           |                     |                      |                                                          |
| Software                                            | Phenix 1.17.1             | Phenix 1.17.1       | Phenix 1.17.1        | Phenix 1.17.1                                            |
| Initial model(s)                                    | 4UG0<br>6MTE<br>5DAT      | 4UG0                | 4UG0<br>6MTE<br>5DAT | 6MTE<br>5DAT<br>5GAK                                     |
| Correlation coefficient (CC <sub>mask</sub> )       | 0.83                      | 0.84                | 0.82                 | 0.76                                                     |
| Map sharpening factor (Å <sup>2</sup> )             | -108.5                    | -89.2               | -73.4                | -50.2                                                    |
| Model composition (chains)                          | 82                        | 77                  | 81                   | 85                                                       |
| Non-hydrogen atoms                                  | 199,914                   | 194,870             | 198,952              | 213,014                                                  |
| Protein residues                                    | 11,179                    | 10,795              | 11,387               | 12,293                                                   |
| nucleotides                                         | 5,130                     | 5,035               | 5,006                | 5,316                                                    |
| Ligands                                             | MG: 202<br>ZN: 7          | MG: 203<br>ZN: 7    | MG: 134<br>ZN: 7     | ZNA: 1<br>MG: 201<br>B8N: 1<br>ZNK: 1<br>ZN: 5<br>4AC: 2 |
| <b>B factors (Å<sup>2</sup>, min/max/mean)</b>      |                           |                     |                      |                                                          |
| Protein                                             | 4.4 / 281.9 / 53.3        | 12.8 / 350.6 / 51.7 | 4.4 / 300.2 / 53.4   | 4.4 / 244.8 / 82.7                                       |
| RNA                                                 | 13.9 / 234.1 / 53.1       | 13.9 / 205.7 / 56.6 | 13.9 / 205.7 / 54.6  | 20.0 / 333.2 / 81.7                                      |
| Ligands                                             | 7.8 / 102.4 / 28.4        | 7.8 / 102.4 / 27.0  | 7.8 / 102.4 / 25.1   | 25.8 / 120.5 / 57.1                                      |
| <b>RMS deviations</b>                               |                           |                     |                      |                                                          |
| Bond length (Å) (#>4 sigma)                         | 0.003                     | 0.003               | 0.003                | 0.005                                                    |
| Bond angle (°) (#>4 sigma)                          | 0.620                     | 0.614               | 0.619                | 0.714                                                    |
| <b>Validation</b>                                   |                           |                     |                      |                                                          |
| MolProbity score                                    | 1.59                      | 1.72                | 1.54                 | 1.68                                                     |
| Clashscore                                          | 6.04                      | 8.01                | 6.95                 | 6.96                                                     |
| Poor Rotamers (%)                                   | 1.30                      | 1.32                | 0.76                 | 1.06                                                     |
| Cβ deviations (%)                                   | 0.01                      | 0.00                | 0.00                 | 0.01                                                     |
| CABLAM outliers (%)                                 | 2.35                      | 2.36                | 2.27                 | 2.25                                                     |
| Favored (%)                                         | 97.03                     | 96.86               | 97.10                | 96                                                       |
| Allowed (%)                                         | 2.97                      | 3.14                | 2.90                 | 4                                                        |
| Disallowed (%)                                      | 0                         | 0                   | 0                    | 0                                                        |

**Supplementary Table 3. CryoDRGN analysis of ribosome particles.** Classification was done based on the presence of eEF2, eIF5a and tRNA factors.

*See excel file*

**Supplementary Table 4. Dap, Dap1b/Dapl1 and Habp4 crosslinks.** Crosslinks identified in ribosome samples from 1 hpf zebrafish embryos and *Xenopus* eggs.

*See excel file*

**Supplementary Table 5. List of primers.** Oligonucleotide sequences used for the generation and genotyping of *dap*, *dap1b* and *habp4* mutants.

| Oligo name          | Sequence (5' to 3')                       |
|---------------------|-------------------------------------------|
| dap_gRNA1           | GTCTCGGTTTTCTCTTTGGG                      |
| dap_gRNA2           | CATGGGCATTACCAGCAGGAAGG                   |
| dap1b_gRNA1         | GTCATCCACCTGCAGGTTTGGG                    |
| dap1b_gRNA2         | GACGAAATCCCCAAACCTGCAGG                   |
| habp4_gRNA1         | ATATAGGATGTCGAAAGGGTCGG                   |
| habp4_gRNA2         | ACCTTGTCGCCCCCACCTGCGG                    |
|                     | AAAAGCACCGACTCGGTGCCACTTTTTCAAGTTGATAA    |
| common_tracer_oligo | CGGACTAGCCTTATTTTAACTTGCTATTCTAGCTCTAAAAC |
| dap_gt_F            | AGTCGACGGTAGTCTGCGTTAT                    |
| dap_gt_R            | TCAAAAAGGTGCCATTTAGTGT                    |
| dap1b_gt_F          | GTGTTTTTGTGAGAAGCGTTTG                    |
| dap1b_gt_R          | CACCATTTGGTCAATAGACGTG                    |
| habp4_gt_F          | GATGAGGGATATGGATGCACCGTGG                 |
| habp4_gt_R          | TCAGTCCCTGCAGCATATAGG                     |
